# Supplementary material for: An innovative Z-type Sb2S3/In2S3/TiO2 heterostructure: superior performance in the photocatalytic removal of levofloxacin and mechanistic insight
Source: Royal Society of Chemistry journal article supplement (doi:10.1039/d3ra08905c), 2024-01-01
Supplement: d3ra08905c1.pdf [file d3ra08905c1.pdf]

# Supporting information

**An innovative Z-type  $\text{Sb}_2\text{S}_3/\text{In}_2\text{S}_3/\text{TiO}_2$  heterostructure: Superior performance in photocatalytic removal of levofloxacin and mechanistic insight**

Jianrou Li, Zhuangzhuang Yin, Jun Guo, Wei Gan, Chen Ruixin, Miao Zhang\*,

Zhaoqi Sun\*

School of Materials Science and Engineering, Anhui University, Hefei 230601, Anhui Province, PR China

\* Corresponding author:

Prof. Zhaoqi Sun, E-mail address: [szq@ahu.edu.cn](mailto:szq@ahu.edu.cn)

Prof. Miao Zhang, E-mail address: [zhmiao@ahu.edu.cn](mailto:zhmiao@ahu.edu.cn)

---

### **Text S1. Photocatalytic activity evaluation**

High performance liquid chromatography-mass spectrometry (LC-MS, thermofisher, LTQ Orbitrap XL) with an electrospray (ESI) source in positive ionization mode ( $m/z=50-750$ ) was used to identify the intermediates of LEV photocatalytic degradation. A Waters BEH C18 column (100 mm x 2.1 mm) was used for HPLC separation at 30 °C. The mobile phases A and B utilized were 0.1% formic acid aqueous solution and acetonitrile, and the detergent flow rate was held constant at 0.2 mL/min. The injection volume for the analysis was 20  $\mu$ L. The linear gradient elution was set as follows: the initial 90% A was reduced to 5% A over 5 min and maintained for 7 min. Then, the mobile phase A was restored to 90% within 1 min and maintained for another 2 min.

### **Text S2. Free radical capture experiment**

Benzoquinone (BQ), isopropyl alcohol (IPA), and disodium ethylenediaminetetraacetate (EDTA-2Na) were selected as the scavengers to trap vacancies ( $h^+$ ), superoxide radicals ( $\bullet O_2^-$ ), and hydroxyl radicals ( $\bullet OH$ ), respectively. All three trapping agents had a concentration of 1.0 mmol/L. Using the 5,5-dimethyl-1-pyrroline-N-oxide (DMPO) spin trapping reagent for electron paramagnetic resonance (EPR, Bruker EMX Plus), the reactive chemicals  $\bullet O_2^-$  and  $\bullet OH$  in the photodegradation reaction were examined.

### **Text S3. Computational details**

The LEV removal efficiency is calculated by the Lambert-Beer law in Eq. S1[12,

---

13]:

$$\eta(\%) = \frac{(C_0/C_t)}{C_0} = \frac{(A_0/A_t)}{A_0} \times 100 \quad (\text{S1})$$

where  $\eta$  denotes the removal efficiency;  $C_0$  and  $C_t$  denote the initial and instantaneous concentrations of LEV (mg/L), respectively;  $A_0$  and  $A_t$  are the absorbance at 0 and t min, respectively.

The photodegradation curve of LEV was fitted by the quasi primary reaction kinetic Eq. S2[12-14]:

$$-\ln\left(\frac{C_t}{C_0}\right) = kt \quad (\text{S2})$$

Here,  $C_0$  and  $C_t$  denote the initial and instantaneous concentrations of LEV (mg/L), respectively;  $k$  is the kinetic constant; and  $t$  is the degradation time (min).

The optical band gap of a photocatalyst can be calculated from its optical absorption spectrum according to the following Eq. S3 [2, 12, 13, 15, 16]:

$$ah\nu = A(h\nu - E_g)^{n/2} \quad (\text{S3})$$

Where,  $a$  is the absorption coefficient,  $h$  is Planck's constant,  $\nu$  is the incident light frequency (Hz),  $A$  is the proportionality constant,  $E_g$  is the optical band gap energy (eV), and the value of  $n$  depends on the semiconductor transition type decision, with  $n$  values of 1 and 4 representing direct and indirect absorption, respectively.

The work function of the catalysts can be obtained by the calculation method below Eq. S4 [15, 16]:

$$\phi = h\nu - |E_{cutoff} - E_F| \quad (\text{S4})$$

Where the  $h\nu$  represents the photon energy of the excitation light used for

---

detection (21.21 eV), the  $E_{cutoff}$  represents the cutoff energy.

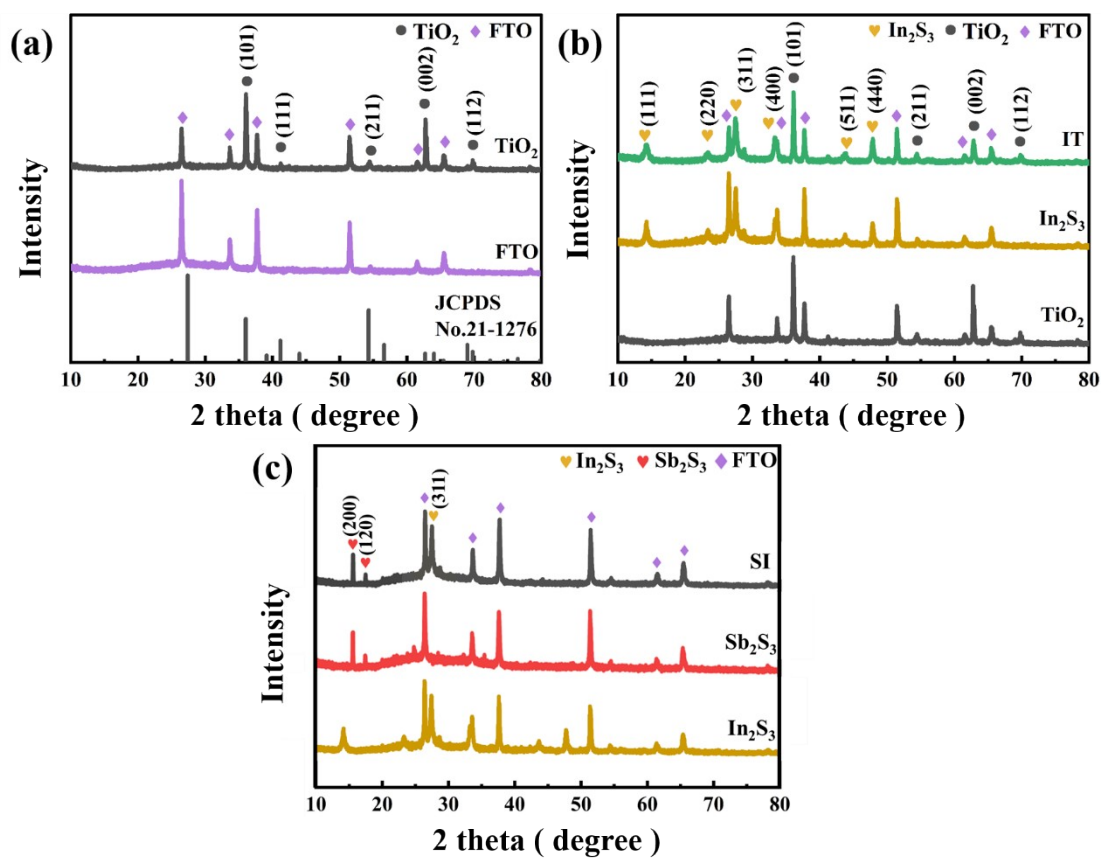

**Fig. S1** XRD patterns of pure  $\text{TiO}_2$  (a), IT (b) and SI (c).

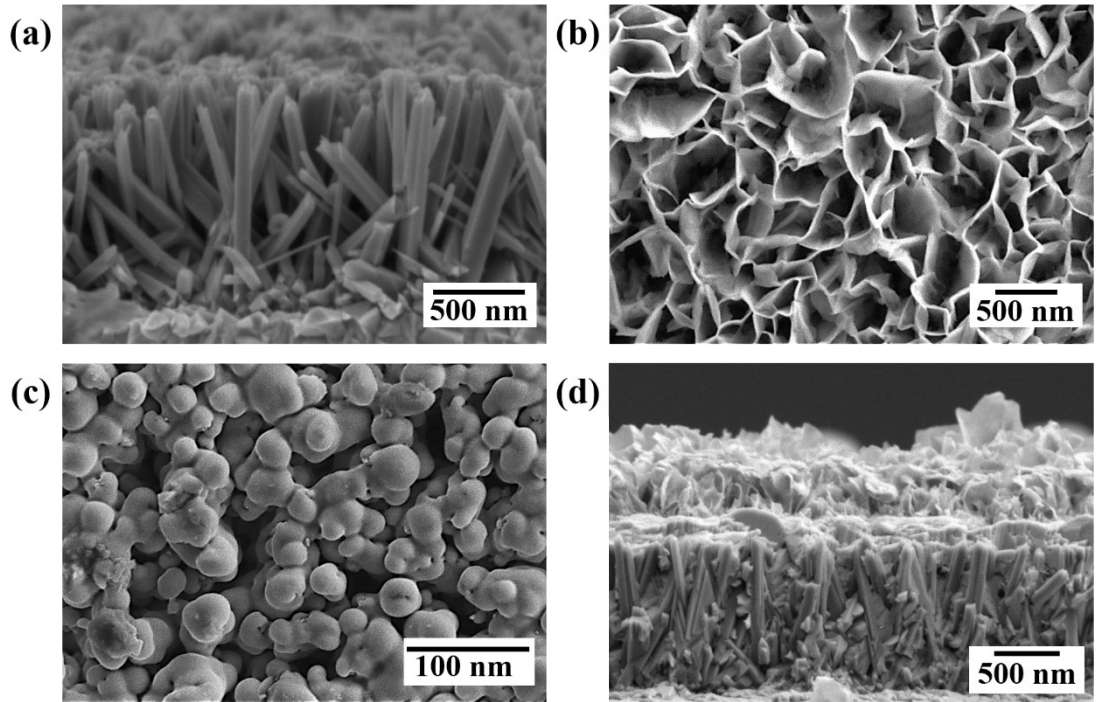

**Fig. S2** SEM images of  $\text{TiO}_2$  (a) cross section,  $\text{In}_2\text{S}_3$  (b),  $\text{Sb}_2\text{S}_3$  (c) and SIT cross sections.

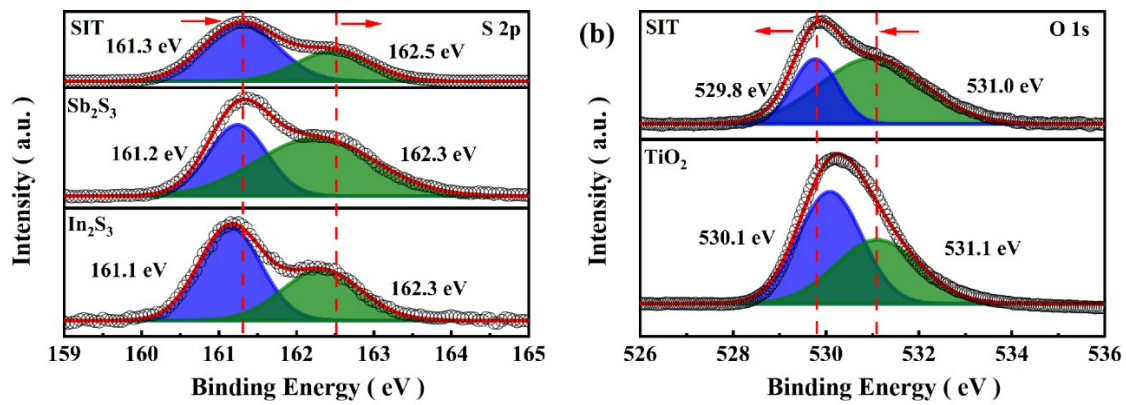

**Fig. S3** XPS spectra of the high-resolution spectra of S 2p(a) and O 1s.

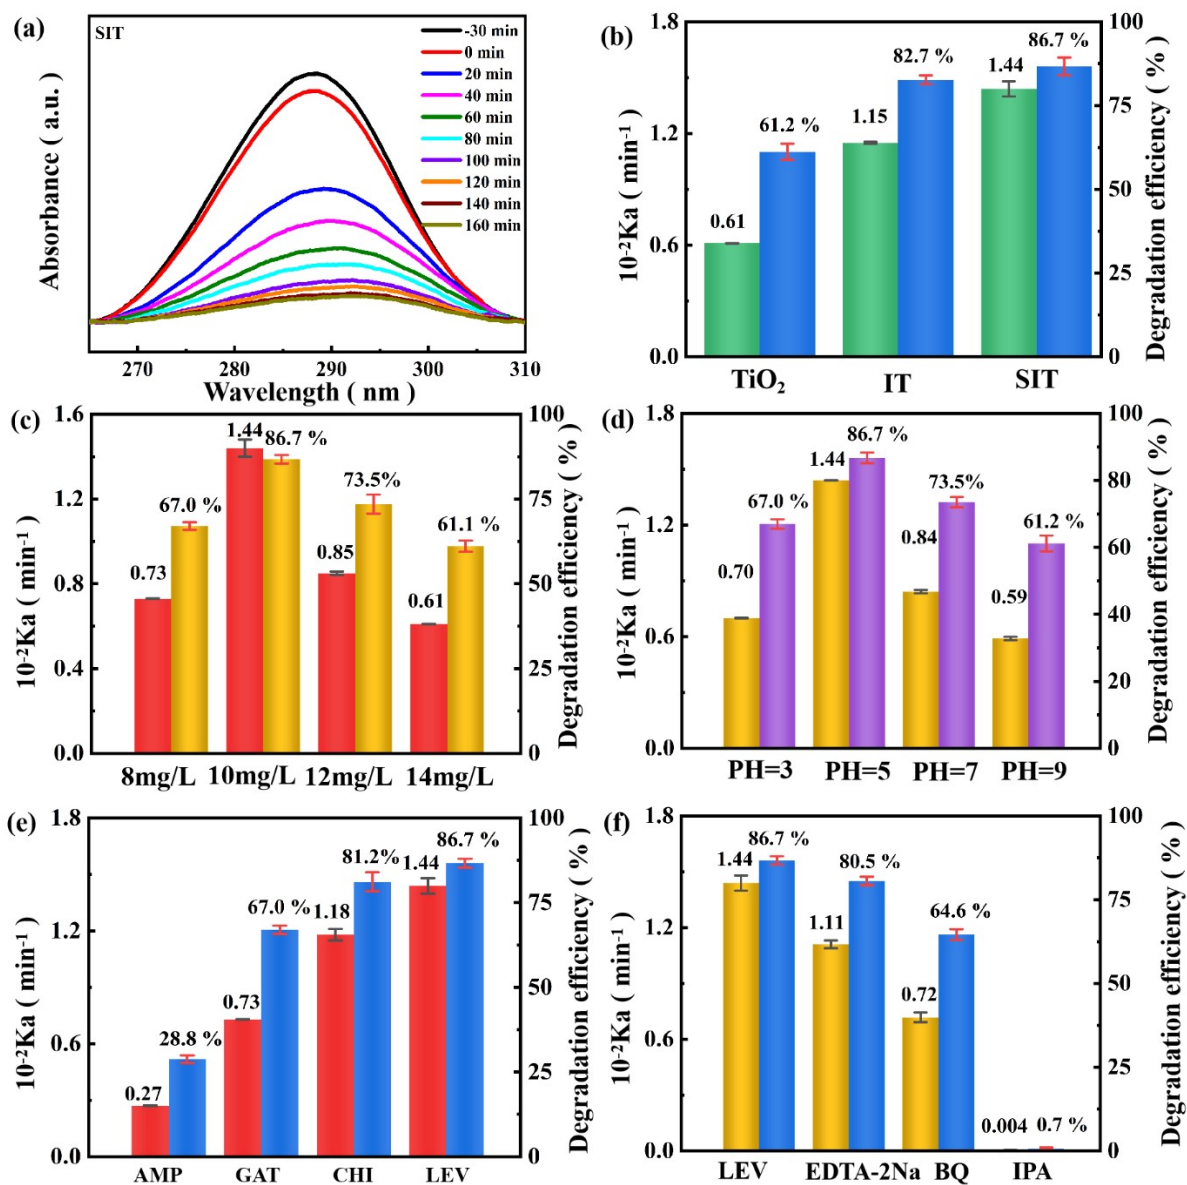

**Fig. S4** The UV-vis spectra of LEV degradation by SIT at different reaction time(a); the apparent constant and degradation % efficiency of different catalysts(b), different LEV concentration(c), different initial pH(d), different antibiotics(e) and different free radical trapping(f).



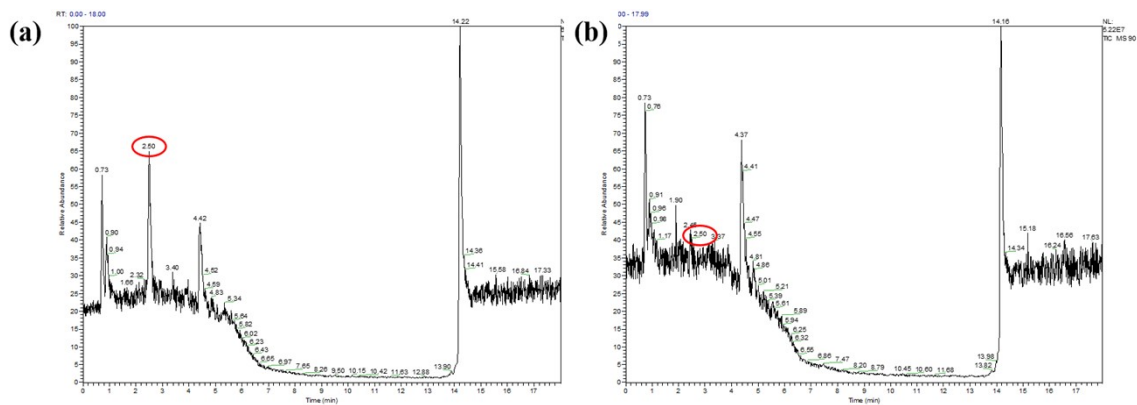

**Fig. S5** MS spectra of LEV (Reaction conditions: [LEV] = 10 mg/L; [photocatalyst size] = 1 cm × 1 cm; pH = 7; T = 25°C).

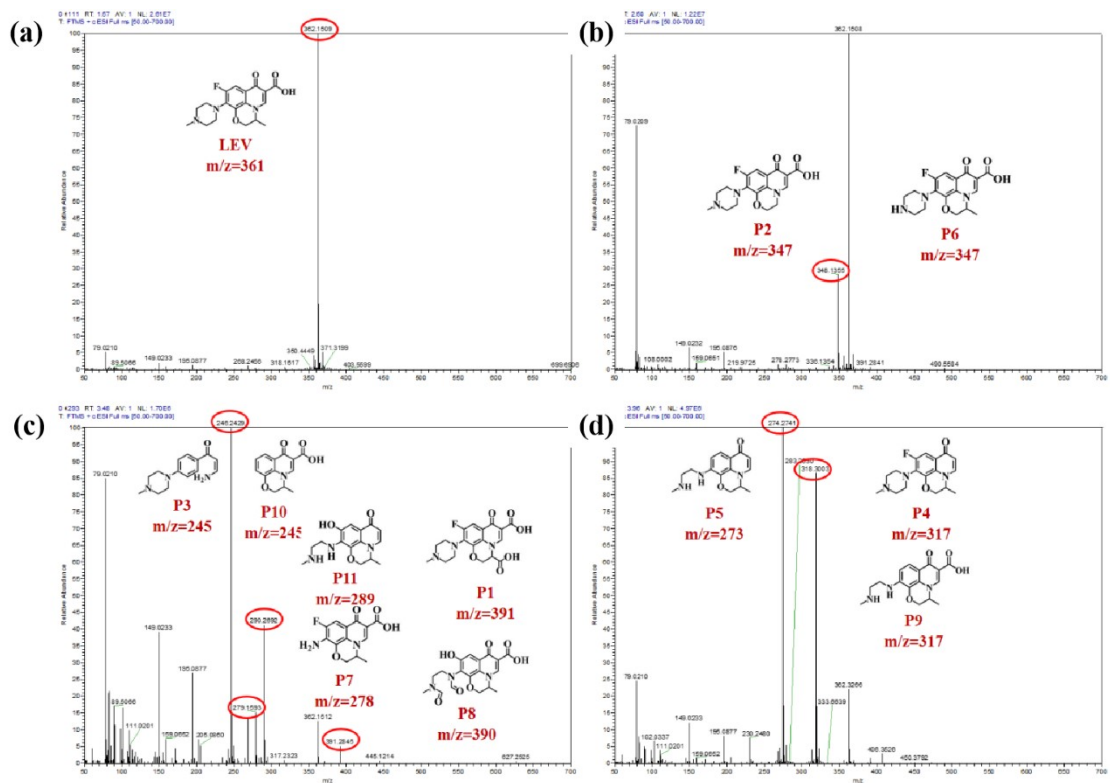

**Fig. S6** LC-MS spectra of LEV degradation with different retention time (a) 0 min, (b) 40 min, (c) 80min, (d) 120min.

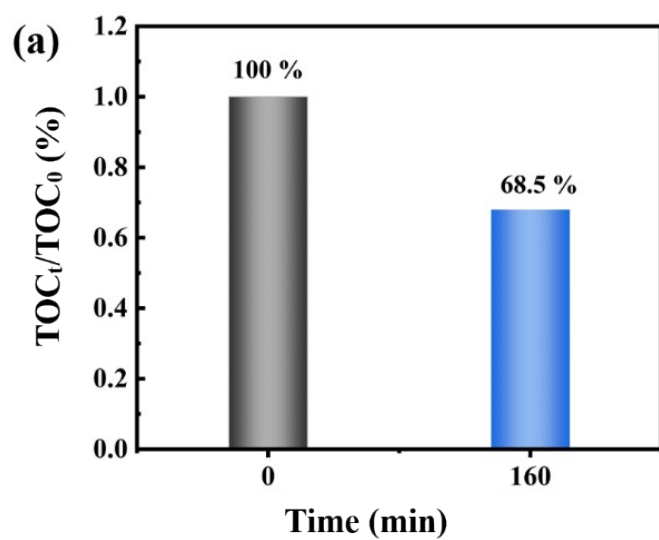

**Fig. S7** Mineralization of LEV by SIT.

**Table. S1** Detailed information of LEV degradation intermediates.

| Compounds | m/z | Formula                                                        | Proposed structure                                                                   | References |
|-----------|-----|----------------------------------------------------------------|--------------------------------------------------------------------------------------|------------|
| LEV       | 361 | C <sub>18</sub> H <sub>20</sub> FN <sub>3</sub> O <sub>4</sub> | 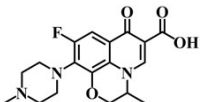   | [1-3]      |
| P1        | 391 | C <sub>18</sub> H <sub>18</sub> FN <sub>3</sub> O <sub>6</sub> |    | [2, 4, 5]  |
| P2        | 347 | C <sub>17</sub> H <sub>18</sub> FN <sub>3</sub> O <sub>4</sub> |    | [1, 5]     |
| P3        | 245 | C <sub>14</sub> H <sub>19</sub> N <sub>3</sub> O               |    | [6]        |
| P4        | 317 | C <sub>17</sub> H <sub>20</sub> FN <sub>3</sub> O <sub>2</sub> |   | [5, 7]     |
| P5        | 273 | C <sub>5</sub> H <sub>6</sub> O <sub>5</sub>                   |  | [5]        |
| P6        | 347 | C <sub>17</sub> H <sub>18</sub> FN <sub>3</sub> O <sub>4</sub> |  | [8, 9]     |
| P7        | 278 | C <sub>13</sub> H <sub>11</sub> FN <sub>2</sub> O <sub>4</sub> |  | [1, 3, 10] |
| P8        | 390 | C <sub>18</sub> H <sub>19</sub> N <sub>3</sub> O <sub>7</sub>  |  | [11]       |
| P9        | 317 | C <sub>15</sub> H <sub>19</sub> N <sub>3</sub> O <sub>2</sub>  |  | [5]        |
| P10       | 245 | C <sub>13</sub> H <sub>11</sub> NO <sub>4</sub>                |  | [6]        |
| P11       | 289 | C <sub>15</sub> H <sub>19</sub> N <sub>3</sub> O <sub>3</sub>  |  | [11]       |

---

## References

- [1] J. Shen, L. Qian, J. Huang, Y. Guo, Z. Zhang, Enhanced degradation toward Levofloxacin under visible light with S-scheme heterojunction  $\text{In}_2\text{O}_3/\text{Ag}_2\text{CO}_3$ : Internal electric field, DFT calculation and degradation mechanism, *Sep. Purif. Technol.*, 275 (2021) 119239. <http://doi.org/10.1016/j.seppur.2021.119239>
- [2] C. Ding, Y. Lu, J. Guo, W. Gan, S. Qi, Z. Yin, M. Zhang, Z. Sun, Internal electric field-mediated sulfur vacancies-modified- $\text{In}_2\text{S}_3/\text{TiO}_2$  thinfilm heterojunctions as a photocatalyst for peroxydisulfate activation: Density functional theory calculations, levofloxacin hydrochloride degradation pathways and toxicity of intermediates, *Chem. Eng. J.*, 450 (2022) 138271. <http://doi.org/10.1016/j.cej.2022.138271>
- [3] J. Nie, X. Yu, Z. Liu, Y. Wei, J. Zhang, N. Zhao, Z. Yu, B. Yao, Boosting principles for the photocatalytic performance of Cr-doped  $\text{Cu}_2\text{O}$  crystallites and mechanisms of photocatalytic oxidation for levofloxacin, *Appl. Surf. Sci.*, 576 (2022) 151842. <http://doi.org/10.1016/j.apsusc.2021.151842>
- [4] Z.-T. Dong, C.-G. Niu, H. Guo, H.-Y. Niu, S. Liang, C. Liang, H.-Y. Liu, Y.-Y. Yang, Anchoring  $\text{CuFe}_2\text{O}_4$  nanoparticles into N-doped carbon nanosheets for peroxydisulfate activation: Built-in electric field dominated radical and non-radical process, *Chem. Eng. J.*, 426 (2021) 130850. <http://doi.org/10.1016/j.cej.2021.130850>
- [5] Q. Deng, X. Zhang, L. Chang, H. Chai, Y. Huang, The MOF/LDH derived

- 
- heterostructured  $\text{Co}_3\text{O}_4/\text{MnCo}_2\text{O}_4$  composite for enhanced degradation of levofloxacin by peroxymonosulfate activation, *Sep. Purif. Technol.*, 294 (2022) 121182. <http://doi.org/10.1016/j.seppur.2022.121182>
- [6] J. Jiang, X. Wang, C. Yue, S. Liu, Y. Lin, T. Xie, S. Dong, Efficient photoactivation of peroxymonosulfate by Z-type nitrogen-defect-rich  $\text{NiCo}_2\text{O}_4/\text{g-C}_3\text{N}_4$  for rapid emerging pollutants degradation, *J. Hazard. Mater.*, 414 (2021) 125528. <http://doi.org/10.1016/j.jhazmat.2021.125528>
- [7] X. Zhang, Y. Zhang, X. Jia, N. Zhang, R. Xia, X. Zhang, Z. Wang, M. Yu, In situ fabrication of a novel S-scheme heterojunction photocatalysts  $\text{Bi}_2\text{O}_3/\text{P-C}_3\text{N}_4$  to enhance levofloxacin removal from water, *Sep. Purif. Technol.*, 268 (2021) 118691. <http://doi.org/10.1016/j.seppur.2021.118691>
- [8] J. Cai, Y. Zhang, T. Qian, X. Li, Z. Chen, L. Zhang, Bismuth oxybromide/bismuth oxyiodide nanojunctions decorated on flexible carbon fiber cloth as easily recyclable photocatalyst for removing various pollutants from wastewater, *J. Colloid Interface Sci.*, 608 (2022) 2660-2671. <http://doi.org/10.1016/j.jcis.2021.10.188>
- [9] C.K. Tsai, Y.C. Lee, T.T. Nguyen, J.J. Horng, Levofloxacin degradation under visible-LED photocatalyzing by a novel ternary  $\text{Fe-ZnO}/\text{WO}_3$  nanocomposite, *Chemosphere*, 298 (2022) 134285. <http://doi.org/10.1016/j.chemosphere.2022.134285>
- [10] Q. Jin, D. Ji, Y. Chen, Z. Tang, Y. Fu, Kinetics and pathway of levofloxacin

- 
- degradation by ferrate(VI) and reaction mechanism of catalytic degradation by copper sulfide, *Sep. Purif. Technol.*, 282 (2022) 120104. <http://doi.org/10.1016/j.seppur.2021.120104>
- [11] L. He, S. Yang, S. Shen, Y. Ma, Y. Chen, J. Xue, J. Wang, L. Zheng, L. Wu, Z. Zhang, L. Yang, Novel insights into the mechanism of periodate activation by heterogeneous ultrasonic-enhanced sludge biochar: Relevance for efficient degradation of levofloxacin, *J. Hazard. Mater.*, 434 (2022) 128860. <http://doi.org/10.1016/j.jhazmat.2022.128860>
- [12] J. Guo, W. Gan, C. Ding, Y. Lu, J. Li, S. Qi, M. Zhang, Z. Sun, Black phosphorus quantum dots and Ag nanoparticles co-modified TiO<sub>2</sub> nanorod arrays as powerful photocatalyst for tetracycline hydrochloride degradation: Pathways, toxicity assessment, and mechanism insight, *Sep. Purif. Technol.*, 297 (2022) 121454. <http://doi.org/10.1016/j.seppur.2022.121454>
- [13] C. Ayappan, V. Jayaraman, B. Palanivel, A. Pandikumar, A. Mani, Facile preparation of novel Sb<sub>2</sub>S<sub>3</sub> nanoparticles/rod-like  $\alpha$ -Ag<sub>2</sub>WO<sub>4</sub> heterojunction photocatalysts: Continuous modulation of band structure towards the efficient removal of organic contaminants, *Sep. Purif. Technol.*, 236 (2020) 116302. <http://doi.org/10.1016/j.seppur.2019.116302>
- [14] S. Sharma, S. Basu, Fabrication of centimeter-sized Sb<sub>2</sub>S<sub>3</sub>/SiO<sub>2</sub> monolithic mimosa pudica nanoflowers for remediation of hazardous pollutants from industrial wastewater, *Journal of Cleaner Production*, 280 (2021) 124525.

---

<http://doi.org/10.1016/j.jclepro.2020.124525>

- [15] Y. Chen, Y. Cheng, J. Zhao, W. Zhang, J. Gao, H. Miao, X. Hu, Construction of  $\text{Sb}_2\text{S}_3/\text{CdS}/\text{CdIn}_2\text{S}_4$  cascaded S-scheme heterojunction for improving photoelectrochemical performance, *J. Colloid Interface Sci.*, 627 (2022) 1047-1060. <http://doi.org/10.1016/j.jcis.2022.07.117>
- [16] J. Zhao, Y. Cheng, Y. Chen, W. Zhang, E. Liu, J. Fan, H. Miao, X. Hu, Defects regulation of  $\text{Sb}_2\text{S}_3$  by construction of  $\text{Sb}_2\text{S}_3/\text{In}_2\text{S}_3$  direct Z-type heterojunction with enhanced photoelectro-chemical performance, *Appl. Surf. Sci.*, 568 (2021) 150917. <http://doi.org/10.1016/j.apsusc.2021.150917>
